# Supplementary material for: Improved understanding of nitrate trends, eutrophication indicators, and risk areas using machine learning
Source: Copernicus journal article supplement (doi:10.5194/bg-22-3769-2025), 2025-08-05
Supplement: Supplementary file 1 [file bg-22-3769-2025-supplement.pdf]

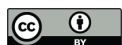

*Supplement of*

## **Improved understanding of nitrate trends, eutrophication indicators, and risk areas using machine learning**

**Deep S. Banerjee and Jozef Skákala**

*Correspondence to:* Deep S. Banerjee (dba@pml.ac.uk)

The copyright of individual parts of the supplement might differ from the article licence.

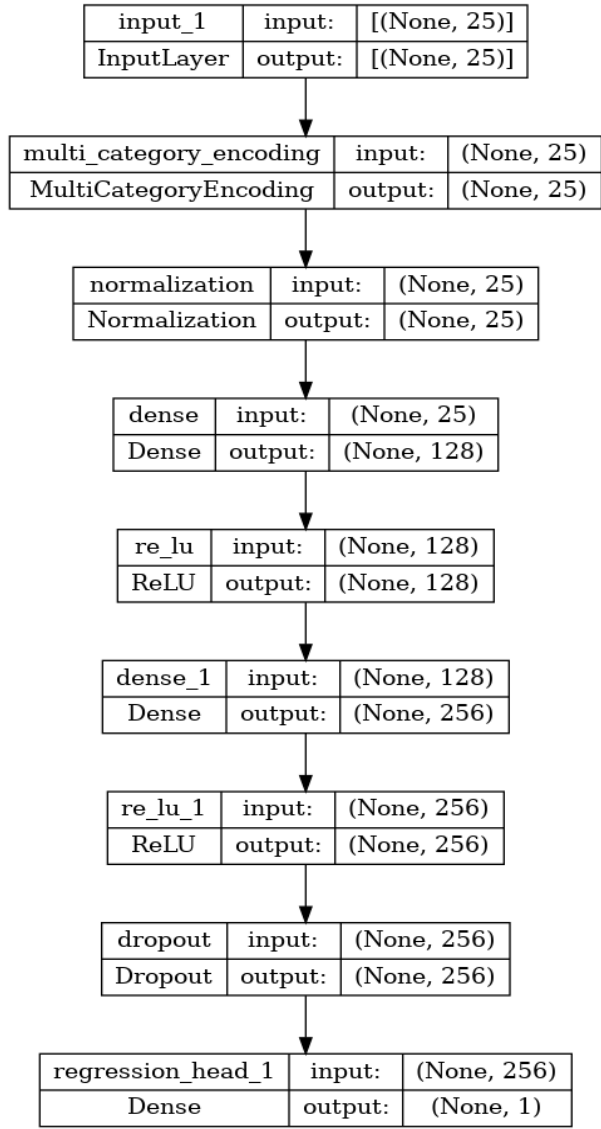

**Figure S1.** The architecture of the NN model used in this study.

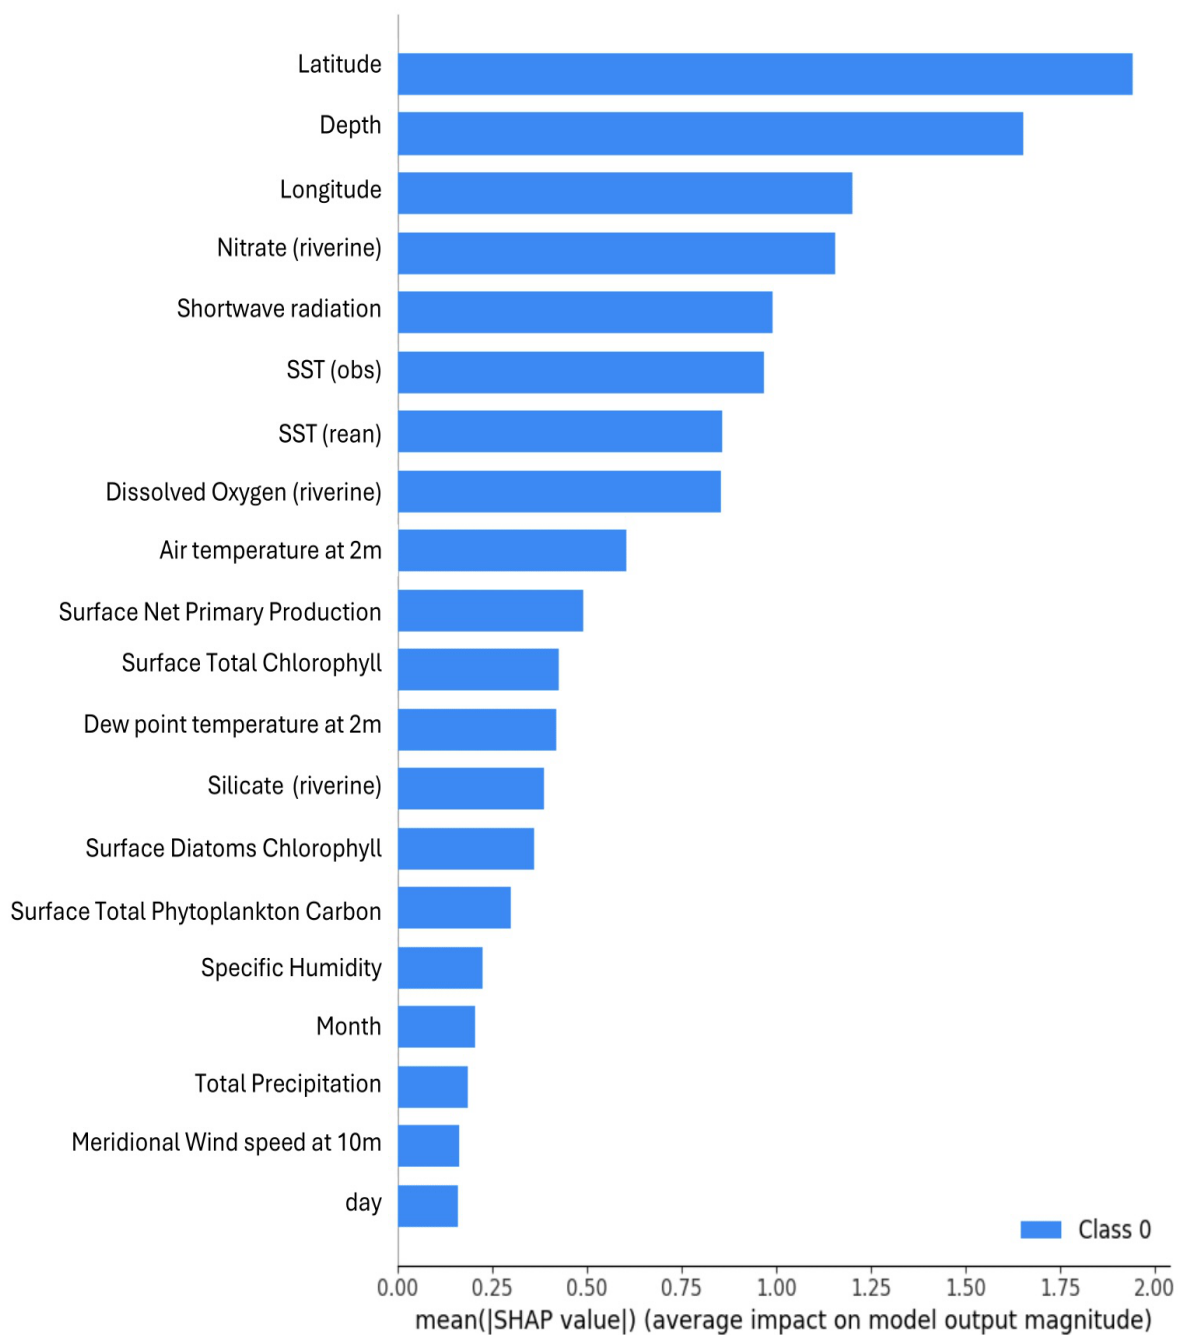

**Figure S2.** Evaluation of input feature importance using SHAP analysis. The features are ordered according to their importance, with 20 most important features shown.

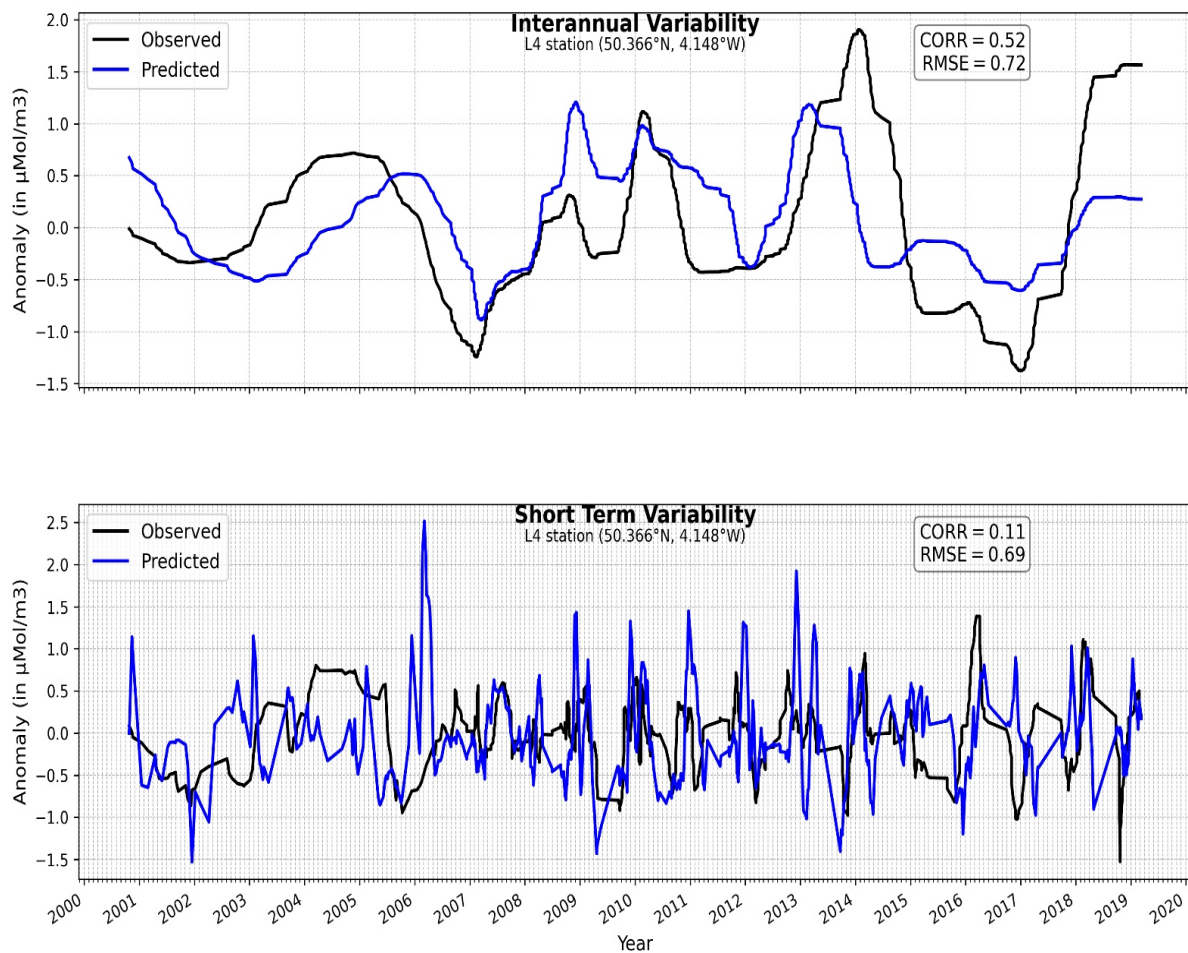

**Figure S3.** The comparison of interannual series (upper plot) and sub-monthly series (bottom plot) for surface nitrate at L4 station, between the NN-prediction and the L4 observations. The time-series were obtained by (i) subtracting seasonal climatology (smoothed on daily time-scale) from nitrate time-series and then (ii) either low-pass filtering the data (inter-annual time-series), or high-pass filtering the data (sub-monthly time-series), both on a 100 day scale.

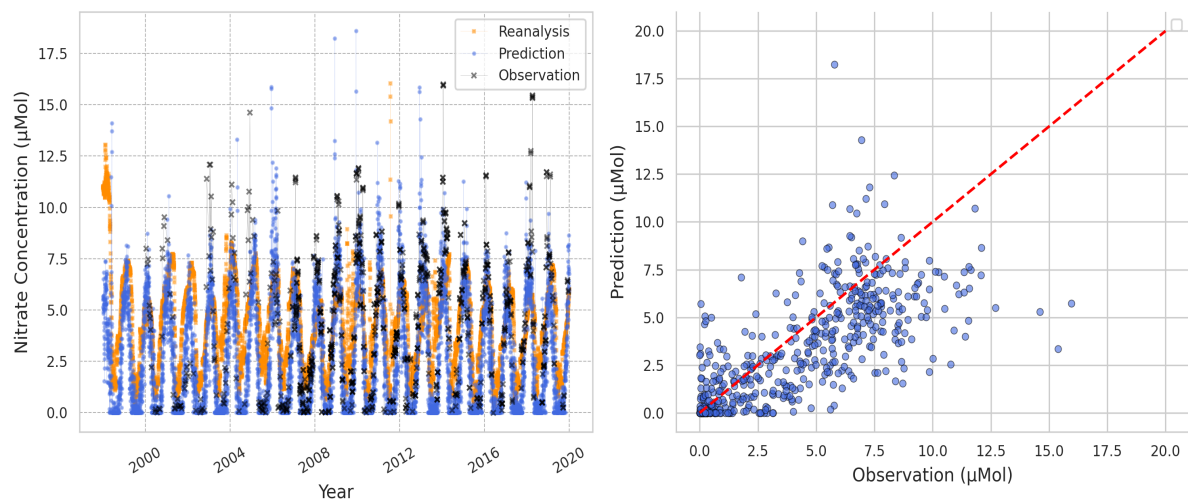

**Figure S4.** The comparison of the surface nitrate NN model prediction with the Copernicus reanalysis and the observations at the L4 station. The NN model prediction is from the NN-generated 1998-2020 gridded nitrate product. Both NN-model prediction and reanalysis are structured on the same spatial grid and were taken from the nearest model grid point to L4.

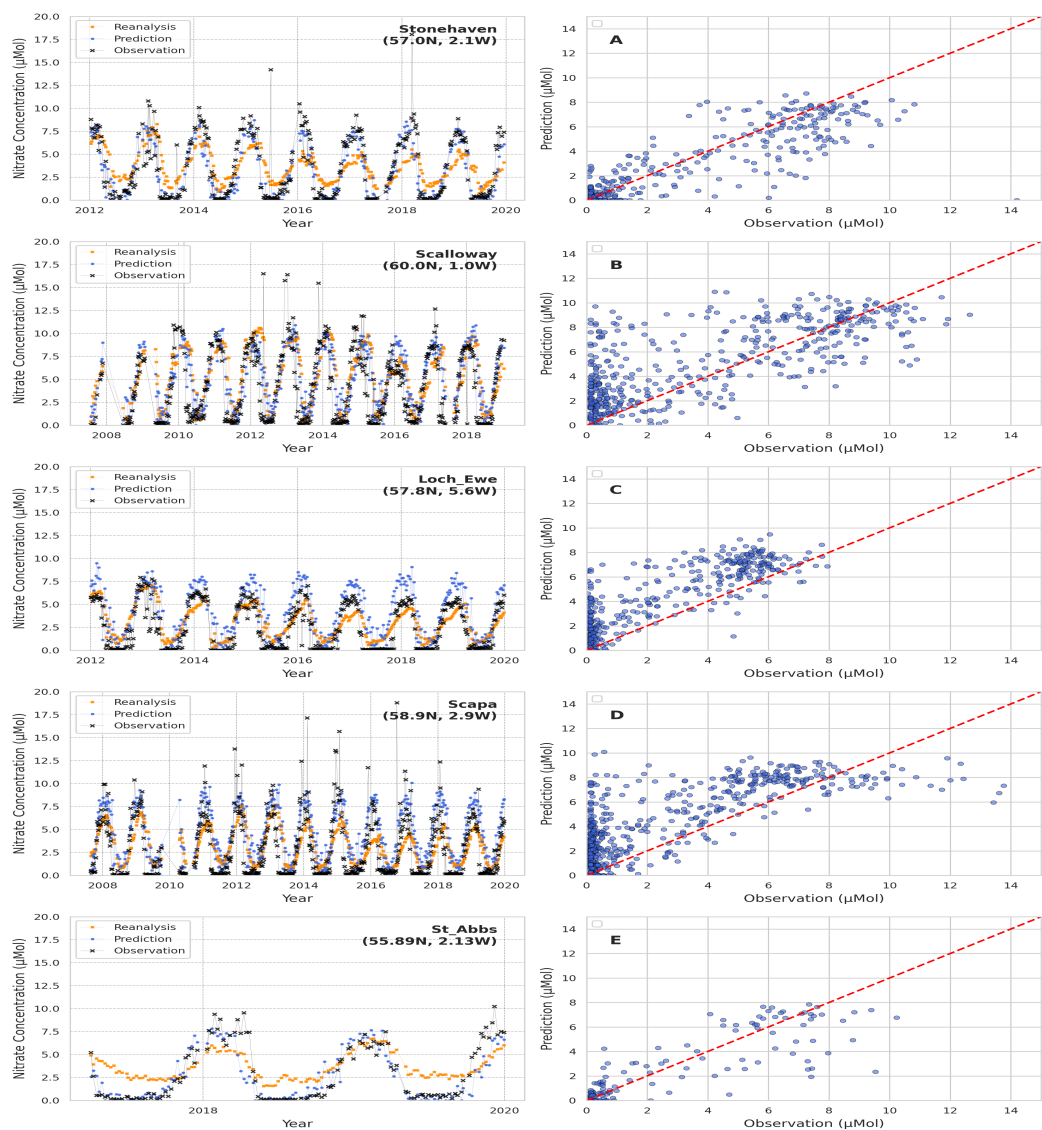

**Figure S5.** The comparison of the surface nitrate NN model prediction with the Copernicus reanalysis and the observations at five Scottish coastal stations. The NN model prediction is from the NN-generated 1998-2020 gridded nitrate product. Both NN-model prediction and reanalysis are structured on the same spatial grid and were taken from the nearest model grid points to the different stations.

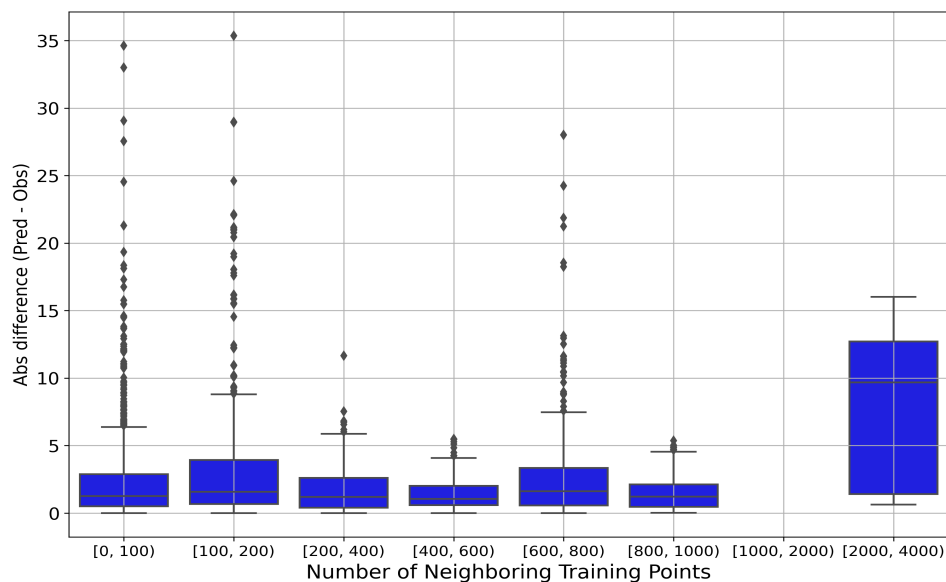

**Figure S6.** The RMSE skill score ( $\mu\text{mol}/\text{m}^3$ ) of the NN-model calculated as a distance from the training data. The score is calculated as follows: (i) for each ICES test data-point we determine the number of training data that fall into the 50 km neighborhood of the test data point. The spatial separation of that test data-point from the training data can be then defined as inversely proportional to the number of training data that fall into the 50 km neighborhood of that test data-point. (ii) The test data are then binned into categories based on their spatial separation from the training data. The  $x$ -axis shows the bins, with their defining feature: the  $[X,Y]$  bin includes test data that have between  $X$  and  $Y$  training data in their 50 km spatial neighborhood. The  $y$ -axis then shows how well the NN model predicts the test data from the specific bin, i.e. it shows the distribution of absolute values of difference between the NN-model prediction and the ICES test data. The black horizontal lines show median values, the blue bars around those lines show two quantiles around the median, the error-bars show the interval with 95% of the values and the remaining extreme values are shown as separate dots.
